# Supplementary material for: Isolation of a wheat (Triticum aestivum L.) mutant in ABA 8′-hydroxylase gene: effect of reduced ABA catabolism on germination inhibition under field condition
Source: PubMed Central journal article supplement — Breed Sci. 2013 Mar 1;63(1):104–15. doi: 10.1270/jsbbs.63.104 (PMC3621436; doi:10.1270/jsbbs.63.104), 2013-03-01
Supplement: 63_104_2.pdf [file 63_104_2.pdf]

## Supplemental Table 1.

List of tested cultivars, breeding lines, introduced cultivars and landraces in Japan

| (A) Cultivars<br>Name | Origine                 | Genotype<br><i>TaABA8'OH1-D</i> |
|-----------------------|-------------------------|---------------------------------|
| Norin 1               | Tohoku, Hokuriku        | non-insertion                   |
| Norin 2               | Tohoku, Hokuriku        | non-insertion                   |
| Norin 3               | Hokkaido                | non-insertion                   |
| Norin 4               | Kinki, Chugoku, Shikoku | non-insertion                   |
| Norin 5               | Kyushu                  | non-insertion                   |
| Norin 6               | Tohoku, Hokuriku        | non-insertion                   |
| Norin 7               | Kanto, Tokai            | non-insertion                   |
| Norin 8               | Hokkaido                | non-insertion                   |
| Norin 9               | Kanto, Tokai            | non-insertion                   |
| Norin 10              | Tohoku, Hokuriku        | non-insertion                   |
| Norin 11              | Kinki, Chugoku, Shikoku | insertion                       |
| Norin 12              | Kanto, Tokai            | non-insertion                   |
| Norin 13              | Kanto, Tokai            | non-insertion                   |
| Norin 14              | Tohoku, Hokuriku        | non-insertion                   |
| Norin 15              | Tohoku, Hokuriku        | non-insertion                   |
| Norin 16              | Kanto, Tokai            | non-insertion                   |
| Norin 17              | Tohoku, Hokuriku        | non-insertion                   |
| Norin 18              | Tohoku, Hokuriku        | non-insertion                   |
| Norin 19              | Kinki, Chugoku, Shikoku | non-insertion                   |
| Norin 20              | Kyushu                  | non-insertion                   |
| Norin 21              | Kinki, Chugoku, Shikoku | non-insertion                   |
| Norin 22              | Tohoku, Hokuriku        | non-insertion                   |
| Norin 23              | Kinki, Chugoku, Shikoku | non-insertion                   |
| Norin 24              | Tohoku, Hokuriku        | non-insertion                   |
| Norin 25              | Kinki, Chugoku, Shikoku | non-insertion                   |
| Norin 26              | Kinki, Chugoku, Shikoku | insertion                       |
| Norin 27              | Tohoku, Hokuriku        | non-insertion                   |
| Norin 28              | Kanto, Tokai            | non-insertion                   |
| Norin 29              | Hokkaido                | non-insertion                   |
| Norin 30              | Kanto, Tokai            | insertion                       |
| Norin 31              | Tohoku, Hokuriku        | non-insertion                   |
| Norin 32              | Kinki, Chugoku, Shikoku | non-insertion                   |
| Norin 33              | Tohoku, Hokuriku        | non-insertion                   |
| Norin 34              | Kyushu                  | non-insertion                   |
| Norin 35              | Hokkaido                | non-insertion                   |
| Norin 36              | Kyushu                  | non-insertion                   |
| Norin 37              | Kinki, Chugoku, Shikoku | non-insertion                   |
| Norin 38              | Tohoku, Hokuriku        | non-insertion                   |
| Norin 39              | Tohoku, Hokuriku        | non-insertion                   |
| Norin 40              | Tohoku, Hokuriku        | non-insertion                   |
| Norin 41              | Kanto, Tokai            | non-insertion                   |
| Norin 42              | Kanto, Tokai            | non-insertion                   |
| Norin 43              | Kinki, Chugoku, Shikoku | insertion                       |
| Norin 44              | Kanto, Tokai            | non-insertion                   |
| Norin 45              | Kyushu                  | non-insertion                   |
| Norin 46              | Kinki, Chugoku, Shikoku | non-insertion                   |
| Norin 47              | Kinki, Chugoku, Shikoku | non-insertion                   |
| Norin 48              | Kanto, Tokai            | non-insertion                   |
| Norin 49              | Kyushu                  | insertion                       |
| Norin 50              | Kanto, Tokai            | insertion                       |
| Norin 51              | Kinki, Chugoku, Shikoku | non-insertion                   |
| Norin 52              | Kinki, Chugoku, Shikoku | non-insertion                   |
| Norin 53              | Kanto, Tokai            | insertion                       |
| Norin 54              | Tohoku, Hokuriku        | non-insertion                   |

|                 |             |                         |               |
|-----------------|-------------|-------------------------|---------------|
| Norin 55        |             | Tohoku, Hokuriku        | non-insertion |
| Norin 56        |             | Kinki, Chugoku, Shikoku | non-insertion |
| Norin 57        |             | Kanto, Tokai            | non-insertion |
| Norin 58        |             | Tohoku, Hokuriku        | non-insertion |
| Norin 59        |             | Kinki, Chugoku, Shikoku | non-insertion |
| Norin 60        |             | Kyushu                  | insertion     |
| Norin 61        |             | Kyushu                  | non-insertion |
| Norin 62        |             | Hokkaido                | non-insertion |
| Norin 63        |             | Kinki, Chugoku, Shikoku | non-insertion |
| Norin 64        |             | Kanto, Tokai            | non-insertion |
| Norin 65        |             | Kinki, Chugoku, Shikoku | non-insertion |
| Norin 66        |             | Tohoku, Hokuriku        | non-insertion |
| Norin 67        |             | Kanto, Tokai            | non-insertion |
| Norin 68        |             | Kanto, Tokai            | insertion     |
| Norin 69        |             | Kanto, Tokai            | insertion     |
| Norin 70        |             | Kanto, Tokai            | non-insertion |
| Norin 71        |             | Kinki, Chugoku, Shikoku | non-insertion |
| Norin 72        |             | Kinki, Chugoku, Shikoku | non-insertion |
| Norin 73        |             | Kinki, Chugoku, Shikoku | non-insertion |
| Norin 74        |             | Kinki, Chugoku, Shikoku | non-insertion |
| Norin 75        |             | Hokkaido                | non-insertion |
| Yuyakekomugi    | (Norin 76)  | Kanto, Tokai            | insertion     |
| Susonokomugi    | (Norin 77)  | Tohoku, Hokuriku        | non-insertion |
| Mutsubenkei     | (Norin 78)  | Tohoku, Hokuriku        | non-insertion |
| Iyokomugi       | (Norin 79)  | Kinki, Chugoku, Shikoku | insertion     |
| Hatamasari      | (Norin 80)  | Kyushu                  | non-insertion |
| Aobakomugi      | (Norin 81)  | Tohoku, Hokuriku        | non-insertion |
| Nanbukomugi     | (Norin 82)  | Tohoku, Hokuriku        | non-insertion |
| Akatsukikomugi  | (Norin 83)  | Kinki, Chugoku, Shikoku | non-insertion |
| Yukichabo       | (Norin 84)  | Tohoku, Hokuriku        | non-insertion |
| Hikarikomugi    | (Norin 85)  | Tohoku, Hokuriku        | non-insertion |
| Myokokomugi     | (Norin 86)  | Tohoku, Hokuriku        | non-insertion |
| Ebisukomugi     | (Norin 87)  | Kyushu                  | non-insertion |
| Hitsumikomugi   | (Norin 88)  | Tohoku, Hokuriku        | non-insertion |
| Kokeshikomugi   | (Norin 89)  | Tohoku, Hokuriku        | non-insertion |
| Okukomugi       | (Norin 90)  | Tohoku, Hokuriku        | non-insertion |
| Sakyukomugi     | (Norin 91)  | Tohoku, Hokuriku        | non-insertion |
| Yutakakomugi    | (Norin 92)  | Kyushu                  | non-insertion |
| Danchikomugi    | (Norin 93)  | Kyushu                  | insertion     |
| Furutsumasari   | (Norin 94)  | Tohoku, Hokuriku        | non-insertion |
| Shirasagikomugi | (Norin 95)  | Kinki, Chugoku, Shikoku | insertion     |
| Junreikomugi    | (Norin 96)  | Kinki, Chugoku, Shikoku | insertion     |
| Kitakamikomugi  | (Norin 97)  | Tohoku, Hokuriku        | non-insertion |
| Fujimikomugi    | (Norin 98)  | Kanto, Tokai            | insertion     |
| Hayatokomugi    | (Norin 99)  | Kyushu                  | non-insertion |
| Mikunikomugi    | (Norin 100) | Kanto, Tokai            | non-insertion |
| Shimofusakomugi | (Norin 101) | Tohoku, Hokuriku        | non-insertion |
| Miyaginokomugi  | (Norin 102) | Tohoku, Hokuriku        | non-insertion |
| Nichirinkomugi  | (Norin 103) | Kyushu                  | non-insertion |
| Haruhikari      | (Norin 104) | Hokkaido                | non-insertion |
| Ushiokomugi     | (Norin 105) | Kinki, Chugoku, Shikoku | non-insertion |
| Omasekomugi     | (Norin 106) | Kanto, Tokai            | non-insertion |
| Hiyokukomugi    | (Norin 107) | Kyushu                  | non-insertion |
| Mukakomugi      | (Norin 108) | Hokkaido                | non-insertion |
| Zenkoujikomugi  | (Norin 109) | Kanto, Tokai            | non-insertion |
| Kobushikomugi   | (Norin 110) | Kanto, Tokai            | non-insertion |
| Haruminori      | (Norin 111) | Hokkaido                | non-insertion |
| Sakigakekomugi  | (Norin 112) | Kyushu                  | non-insertion |
| Hachimankomugi  | (Norin 113) | Tohoku, Hokuriku        | non-insertion |

|                 |             |                         |               |
|-----------------|-------------|-------------------------|---------------|
| Horoshirikomugi | (Norin 114) | Hokkaido                | non-insertion |
| Takunekomugi    | (Norin 115) | Hokkaido                | non-insertion |
| Hanagasakomugi  | (Norin 116) | Tohoku, Hokuriku        | non-insertion |
| Shiroganekomugi | (Norin 117) | Kyushu                  | non-insertion |
| Gogatsukomugi   | (Norin 118) | Kyushu                  | non-insertion |
| Toyohokomugi    | (Norin 119) | Kanto, Tokai            | non-insertion |
| Setokomugi      | (Norin 120) | Kyushu                  | insertion     |
| Chikushikomugi  | (Norin 121) | Kyushu                  | non-insertion |
| Shirowasekomugi | (Norin 122) | Kyushu                  | non-insertion |
| Asakazekomugi   | (Norin 123) | Kyushu                  | insertion     |
| Fukuhokomugi    | (Norin 124) | Kanto, Tokai            | non-insertion |
| Minaminokomugi  | (Norin 125) | Kyushu                  | non-insertion |
| Chihokukomugi   | (Norin 126) | Hokkaido                | non-insertion |
| Wakamatsukomugi | (Norin 127) | Tohoku, Hokuriku        | non-insertion |
| Fukuwasekomugi  | (Norin 128) | Kinki, Chugoku, Shikoku | non-insertion |
| Nishikazekomugi | (Norin 129) | Kyushu                  | non-insertion |
| Haruyutaka      | (Norin 130) | Hokkaido                | non-insertion |
| Shiranekomugi   | (Norin 131) | Kanto, Tokai            | non-insertion |
| Airakomugi      | (Norin 132) | Kanto, Tokai            | non-insertion |
| Koyukikomugi    | (Norin 133) | Tohoku, Hokuriku        | non-insertion |
| Daichinominori  | (Norin 134) | Kyushu                  | non-insertion |
| Bandouwase      | (Norin 135) | Kanto, Tokai            | non-insertion |
| Taisetsukomugi  | (Norin 136) | Hokkaido                | non-insertion |
| Akitakko        | (Norin 137) | Tohoku, Hokuriku        | non-insertion |
| Abukumawase     | (Norin 138) | Kyushu                  | insertion     |
| Harunoakebono   | (Norin 139) | Hokkaido                | non-insertion |
| Kinuiroha       | (Norin 140) | Kyushu                  | non-insertion |
| Chikugoizumi    | (Norin 141) | Kyushu                  | non-insertion |
| Hokushin        | (Norin 142) | Hokkaido                | non-insertion |
| Syunyou         | (Norin 143) | Kanto, Tokai            | insertion     |
| Nishihonami     | (Norin 144) | Kyushu                  | non-insertion |
| Iwainodaichi    | (Norin 145) | Kyushu                  | non-insertion |
| Nishinokaori    | (Norin 146) | Kyushu                  | insertion     |
| Ayahikari       | (Norin 147) | Kanto, Tokai            | non-insertion |
| Kinuhime        | (Norin 148) | Kanto, Tokai            | insertion     |
| Kitamoe         | (Norin 149) | Hokkaido                | non-insertion |
| Haruhinode      | (Norin 150) | Hokkaido                | non-insertion |
| Kinuazuma       | (Norin 151) | Kanto, Tokai            | non-insertion |
| Nebarigoshi     | (Norin 152) | Tohoku, Hokuriku        | non-insertion |
| Haruibuki       | (Norin 153) | Tohoku, Hokuriku        | non-insertion |
| Yumeseiki       | (Norin 154) | Kanto, Tokai            | non-insertion |
| Tamaizumi       | (Norin 155) | Kanto, Tokai            | insertion     |
| Fukusayaka      | (Norin 156) | Kinki, Chugoku, Shikoku | non-insertion |
| Yukichikara     | (Norin 157) | Tohoku, Hokuriku        | non-insertion |
| Kitanokaori     | (Norin 158) | Hokkaido                | non-insertion |
| Fuusetsu        | (Norin 159) | Kanto, Tokai            | non-insertion |
| Minaminokaori   | (Norin 160) | Kyushu                  | non-insertion |

---

| (B) Breeding lines     |                         | Genotype            |
|------------------------|-------------------------|---------------------|
| Name                   | Origine                 | <i>TaABA8'OH1-D</i> |
| Chugoku 53             | Kinki, Chugoku, Shikoku | insertion           |
| Chugoku 55             | Kinki, Chugoku, Shikoku | non-insertion       |
| Chugoku 81             | Kinki, Chugoku, Shikoku | non-insertion       |
| Chugoku 91             | Kinki, Chugoku, Shikoku | insertion           |
| Chugoku 98             | Kinki, Chugoku, Shikoku | non-insertion       |
| Chugoku 114            | Kinki, Chugoku, Shikoku | insertion           |
| Hokkai 195             | Hokkaido                | non-insertion       |
| Hokkai 240             | Hokkaido                | non-insertion       |
| Kankei w361            | Kanto, Tokai            | insertion           |
| Kankei w364            | Kanto, Tokai            | insertion           |
| Kanto 66               | Kanto, Tokai            | insertion           |
| Kanto 79               | Kanto, Tokai            | non-insertion       |
| Kanto 82               | Kanto, Tokai            | non-insertion       |
| Kanto 87               | Kanto, Tokai            | insertion           |
| Kanto 95               | Kanto, Tokai            | hetero              |
| Kanto 99               | Kanto, Tokai            | non-insertion       |
| Kanto 101              | Kanto, Tokai            | non-insertion       |
| Kanto 107              | Kanto, Tokai            | non-insertion       |
| Kitakanto 44           | Kanto, Tokai            | non-insertion       |
| Kitakanto 48           | Kanto, Tokai            | non-insertion       |
| Kitakei 8              | Hokkaido                | non-insertion       |
| Kitakei 221            | Hokkaido                | non-insertion       |
| Kitakei 320            | Hokkaido                | non-insertion       |
| Kitakei 497            | Hokkaido                | non-insertion       |
| Kitakei 1354           | Hokkaido                | non-insertion       |
| Kitami 16              | Hokkaido                | non-insertion       |
| Kitami 18              | Hokkaido                | non-insertion       |
| Kitami 19              | Hokkaido                | non-insertion       |
| Kitami 35              | Hokkaido                | non-insertion       |
| Saikai 77              | Kyushu                  | insertion           |
| Saikai 87              | Kyushu                  | non-insertion       |
| Saikai 95              | Kyushu                  | insertion           |
| Saikai 98              | Kyushu                  | non-insertion       |
| Saikai 104             | Kyushu                  | non-insertion       |
| Saikai 113             | Kyushu                  | non-insertion       |
| Tanikei H2986          | Kanto, Tokai            | non-insertion       |
| Tohoku 71              | Tohoku, Hokuriku        | non-insertion       |
| Tohoku 101             | Tohoku, Hokuriku        | non-insertion       |
| Tohoku 118             | Tohoku, Hokuriku        | non-insertion       |
| Touzan 18              | Kanto, Tokai            | non-insertion       |
| Touzan 38 (Yumeasahi)  | Kanto, Tokai            | non-insertion       |
| Touzan 40 (Hanamanten) | Kanto, Tokai            | non-insertion       |

| (C) Japanese landraces |                         | Genotype            |
|------------------------|-------------------------|---------------------|
| Name                   | Origine                 | <i>TaABA8'OH1-D</i> |
| Akaboza                | Kanto, Tokai            | non-insertion       |
| Akadaruma              | Kanto, Tokai            | non-insertion       |
| Akakawaaka             | Hokkaido                | non-insertion       |
| Akakomugi              | Kanto, Tokai            | non-insertion       |
| Aki 9                  | Kyushu                  | non-insertion       |
| Dawson 1               | Hokkaido                | non-insertion       |
| Eshima                 | Kinki, Chugoku, Shikoku | non-insertion       |
| Eshimashinriki         | Kyushu                  | non-insertion       |
| Fukuokakomugi 18       | Kyushu                  | non-insertion       |
| Furutsudaruma          | Tohoku, Hokuriku        | non-insertion       |
| Hayakomugi             | Kyushu                  | insertion           |
| Hirakikomugi           | Kinki, Chugoku, Shikoku | non-insertion       |
| Hiroshimashipuree 3    | Kinki, Chugoku, Shikoku | non-insertion       |
| Igachikugo             | Kyushu                  | non-insertion       |
| Igachikugo Oregon      | Kanto, Tokai            | non-insertion       |
| Saitama 27             | Kanto, Tokai            | non-insertion       |
| Saitama 29             | Kanto, Tokai            | non-insertion       |
| Sanin 1                | Kinki, Chugoku, Shikoku | non-insertion       |
| Shinchunaga            | Kinki, Chugoku, Shikoku | insertion           |
| Shinrikikomugi         | Kinki, Chugoku, Shikoku | non-insertion       |
| Shirochabo             | Kanto, Tokai            | non-insertion       |
| Shiroboro 21           | Kanto, Tokai            | non-insertion       |
| Shirodaruma            | Kanto, Tokai            | non-insertion       |
| Shirokomugi            | Kyushu                  | non-insertion       |
| Shirosanjaku           | Kanto, Tokai            | non-insertion       |
| Shisen 1               | Tohoku, Hokuriku        | non-insertion       |
| Sojukuakage            | Kyushu                  | non-insertion       |
| Yushoki 347            | Kinki, Chugoku, Shikoku | non-insertion       |

| (D) Introduced cultivars |           | Genotype            |
|--------------------------|-----------|---------------------|
| Name                     | Origine   | <i>TaABA8'OH1-D</i> |
| Alsen                    | USA       | non-insertion       |
| Ardito                   | Italy     | non-insertion       |
| Aroona                   | Australia | non-insertion       |
| Arrino                   | Australia | non-insertion       |
| AUS1408                  | Australia | non-insertion       |
| Australia 8              | Australia | non-insertion       |
| Australia 13             | Australia | non-insertion       |
| Cadoux                   | Australia | non-insertion       |
| California               | USA       | non-insertion       |
| Chinese Spring           | China     | non-insertion       |
| Combine                  | Italy     | non-insertion       |
| Corringin                | Australia | non-insertion       |
| Creopatra                | Mexico    | non-insertion       |
| D6899                    | USA       | non-insertion       |
| Eradu                    | Australia | non-insertion       |
| Geurmil                  | Korea     | non-insertion       |
| Hope                     | GB        | non-insertion       |
| IA7873                   | Mexico    | non-insertion       |
| Jagger                   | USA       | non-insertion       |
| Joshuu                   | China     | non-insertion       |
| Kanred                   | USA       | non-insertion       |
| KS831957                 | USA       | non-insertion       |
| Martin                   | USA       | non-insertion       |
| Nainari S60              | Mexico    | non-insertion       |
| Noudai 16                | China     | non-insertion       |
| Oregon                   | USA       | non-insertion       |
| Pampa INTA               | Argentina | non-insertion       |
| Parchall                 | USA       | non-insertion       |
| Reeder                   | USA       | non-insertion       |
| Rieti                    | Italy     | non-insertion       |
| Roblin                   | Canada    | non-insertion       |
| Rosella                  | Australia | non-insertion       |
| Shikan                   | China     | non-insertion       |
| Suweon235                | Korea     | non-insertion       |
| Tapdongmil               | Korea     | non-insertion       |
| Timstein                 | USA       | non-insertion       |
| Tordo                    | Mexico    | non-insertion       |
| Turkey Red II            | USA       | non-insertion       |
| U-11(Purcam)             | USA       | non-insertion       |
| Wichita                  | USA       | non-insertion       |
| Tom Thumb                | USA       | non-insertion       |
